# Supplementary material for: Theoretical study on mechanisms of the high-temperature reactions C2H3 + H2O and C2H4 + OHElectronic supplementary information (ESI) available: Figures of optimized geometries of the fragments of C2H5O radicals, C2H5O isomers and C2H5O transition states and table of harmonic vibration frequencies of C2H3, H2O, TSR/P1, C2H4 and OH. See http://www.rsc.org/suppdata/cp/b1/b109758j/
Source: Royal Society of Chemistry journal article supplement (doi:10.1039/b109758j), 2002-02-15
Supplement: suppdata.doc [file suppdata.doc]

Figure S1. Optimized geometries of the fragments of C2H5O radicals at the B3LYP/6-311G(d,p), B3LYP/6-31G(d,p) (in parentheses), or QCISD/6-31G(d,p) (in square brackets) levels. Bond lengths are in angstroms and angles in degrees.

Figure S2. Optimized geometries of C2H5O isomers at the B3LYP/6-311G(d,p) level. Bond lengths are in angstroms and angles in degrees.

Figure S3. Optimized geometries of C2H5O transition states at the B3LYP/6-311G(d,p), B3LYP/6-31G(d,p) (in parentheses), or QCISD/6-31G(d,p) (in square brackets) levels. Bond lengths are in angstroms and angles in degrees.

Figure S3 (continued)

Figure S3 (continued)

Table S1. Harmonic vibration frequencies (cm-1) of C2H3, H2O, **TSR/P1**, C2H4, and OH at the B3LYP/6-31G(d,p), B3LYP/6-311G(d,p) and QCISD/6-31G(d,p) levels

| species | B3LYP/6-31G(d,p) | B3LYP/6-311G(d,p) | QCISD/6-31G(d,p) |
| --- | --- | --- | --- |
| C2H3 | 723, 816, 922, 1063, 1404, 1671, 3067, 3165, 3254 | 712, 820, 921, 1046, 1391, 1650, 3038, 3134, 3236 | 768, 836, 943, 1115, 1442, 1676, 3160, 3263, 3319 |
| H2O | 1666, 3799, 3912 | 1639, 3809, 3906 | 1699, 3887, 4011 |
| **TSR/P1** | 1245i, 121, 148, 311, 576, 788, 815, 894, 962, 1088, 1242, 1329, 1417, 1690, 3126, 3197, 3218, 3757 | 1235i, 136, 165, 322, 590, 796, 831, 902, 963, 1105, 1233, 1317, 1407, 1669, 3102, 3174, 3192, 3761 | 2070i, 121, 158, 316, 569, 800, 825, 923, 984, 1121, 1276, 1399, 1459, 1716, 3204, 3278, 3301, 3825 |
| C2H4 | 832, 961, 977, 1069, 1242, 1389, 1483, 1715, 3145, 3161, 3221, 3247 | 835, 973, 973, 1067, 1239, 1379, 1472, 1692, 3122, 3137, 3193, 3222, | 847, 939, 985, 1068, 1268, 1407, 1523, 1732, 3212, 3231, 3298, 3321 |
| OH | 3697 | 3705 | 3375 |
